# Supplementary material for: Genetic and phenotypic analysis of Vibrio cholerae non-O1, non-O139 isolated from German and Austrian patients
Source: PubMed Central journal article supplement — Eur J Clin Microbiol Infect Dis. 2013 Nov 10;33(5):767–78. doi: 10.1007/s10096-013-2011-9 (PMC3996285; doi:10.1007/s10096-013-2011-9), 2013-11-10
Supplement: 10096_2013_2011_MOESM1_ESM.pdf [file 10096_2013_2011_MOESM1_ESM.pdf]

**Fig. S1** Biofilm formation of *Vibrio cholerae* strains. Each strain was tested four times in each dilution (1:10, 1:100). VN-0309 was set as 100%. Experiments were repeated three times. Shown are the results with the highest biofilm activity for each strain.

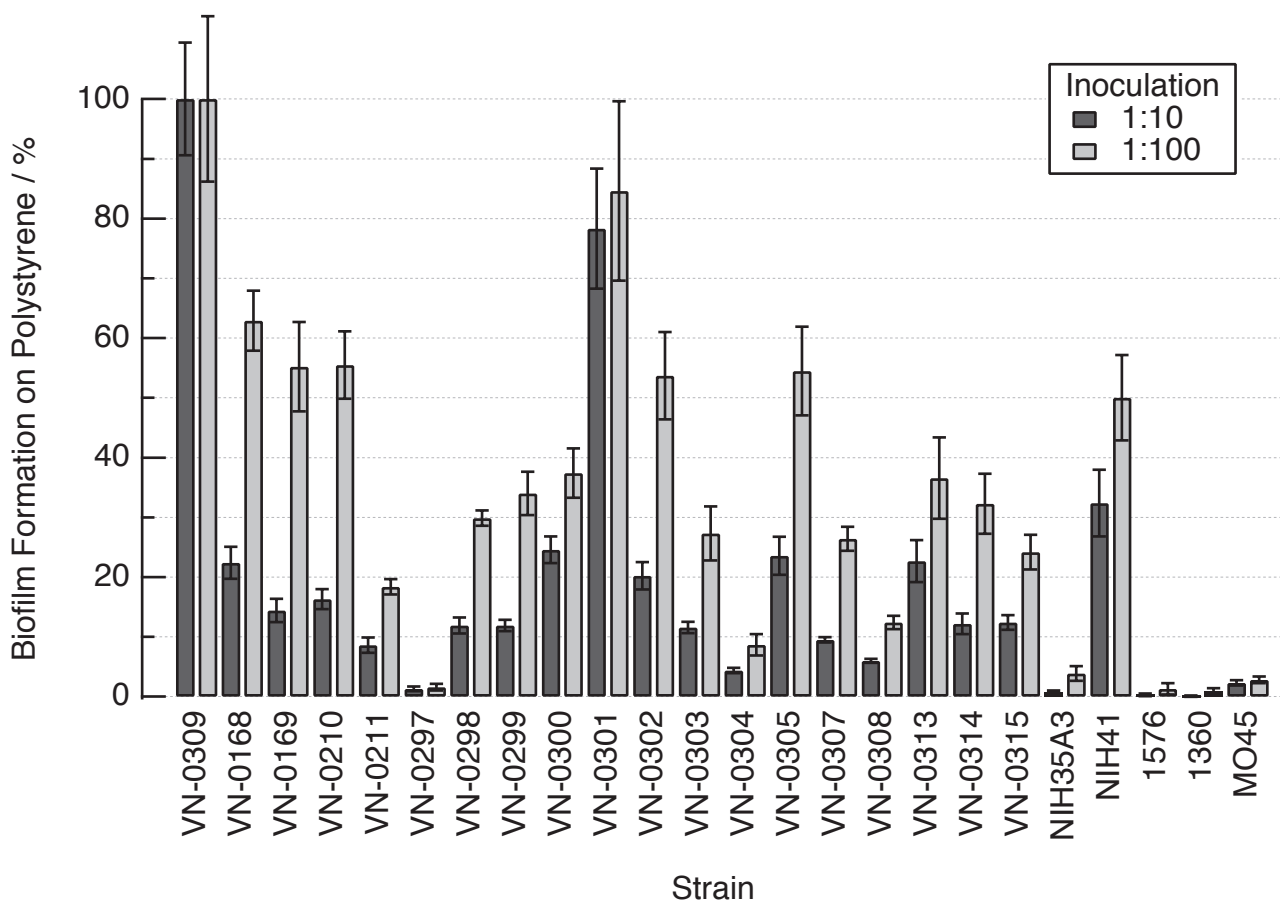

**Fig. S2** Quantitative hemolysis of human erythrocytes by different *V. cholerae* strains and their culture supernatants. Each strain was tested three times.

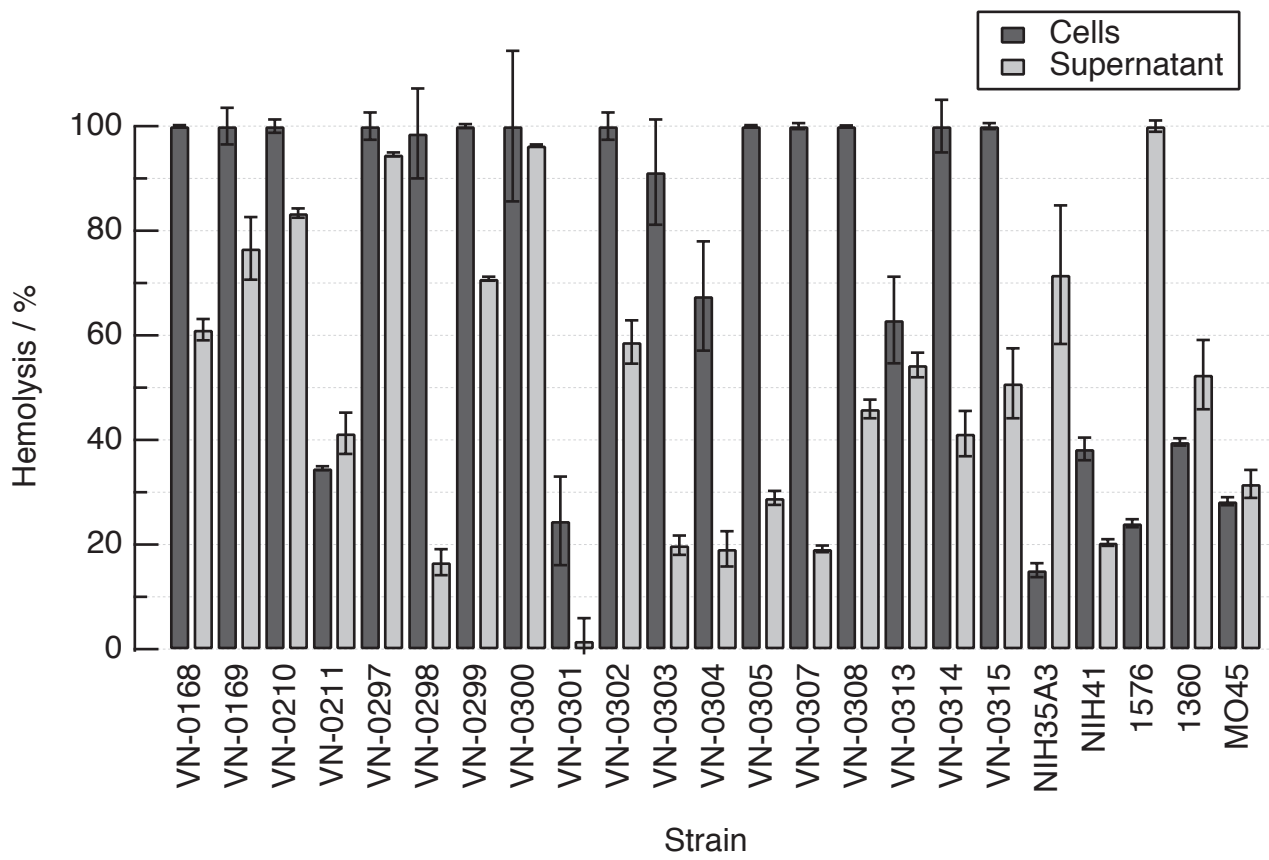

**Tab. S1** Resistance against human serum. Strains were tested in three separate experiments (I, II, III).

| <b>Strain</b> | <b>I</b> | <b>II</b> | <b>III</b> |
|---------------|----------|-----------|------------|
| VN-0168       | 10       | 10        | 10         |
| VN-0169       | 10       | 10        | 10         |
| VN-0210       | 0        | 0         | 0          |
| VN-0211       | 80       | 80        | 80         |
| VN-0297       | 40       | 40        | 40         |
| VN-0298       | 10       | 10        | 10         |
| VN-0299       | 20       | 20        | 20         |
| VN-0300       | 10       | 10        | 10         |
| VN-0301       | 20       | 20        | 10         |
| VN-0302       | 10       | 10        | 10         |
| VN-0303       | 0        | 0         | 0          |
| VN-0304       | 40       | 40        | 10         |
| VN-0305       | 10       | 0         | 10         |
| VN-0307       | 10       | 10        | 10         |
| VN-0308       | 80       | 80        | 80         |
| VN-0313       | 80       | 80        | 80         |
| VN-0314       | 0        | 0         | 0          |
| VN-0315       | 10       | 0         | 0          |
| NIH35A3 (O1)  | 10       | 0         | 10         |
| NIH41 (O1)    | 80       | 40        | 80         |
| 1576 (O1)     | 0        | 0         | 0          |
| 1360 (O1)     | 0        | 0         | 0          |
| MO45 (O139)   | 40       | 40        | 40         |
